# Supplementary material for: Application of hard and soft acid base theory to uncover the destructiveness of Lewis bases to UiO-66 type metal organic frameworks in aqueous solutions
Source: Royal Society of Chemistry journal article supplement (doi:10.1039/d1ta02169a), 2021-01-01
Supplement: d1ta02169a1.pdf [file d1ta02169a1.pdf]

***Supporting Information For:***

**Application of hard and soft acid base theory to uncover Lewis bases'  
destructiveness to UiO-66 type metal organic frameworks in aqueous  
solutions**

Liangjie Wang<sup>a,b</sup>, Juan Li<sup>b</sup>, Luyao Cheng<sup>b</sup>, Yonghui Song<sup>b,\*</sup>, Ping Zeng<sup>b,\*</sup>, Xianghua  
Wen<sup>a,\*</sup>

*<sup>a</sup> School of Environment, Tsinghua University, Beijing 100084, China*

*<sup>b</sup> State Key Laboratory of Environmental Criteria and Risk Assessment, Chinese  
Research Academy of Environmental Sciences, Beijing 100012, China*

\*Corresponding author.

E-mail address: zengping@craes.org.cn; songyh@craes.org.cn; xhwen@tsinghua.edu.cn

## Equations

|                                                                                                          |       |
|----------------------------------------------------------------------------------------------------------|-------|
| Vertical ionization potential (VIP): $E(N-1) - E(N)$                                                     | Eq.S1 |
| Vertical electron affinity (VEA): $E(N) - E(N+1)$                                                        | Eq.S2 |
| Electronegativity ( $\chi$ ): $(VIP+VEA)/2$                                                              | Eq.S3 |
| Chemical potential ( $\mu$ ): $-\chi$                                                                    | Eq.S4 |
| Chemical hardness ( $\eta$ ): $VIP-VEA$                                                                  | Eq.S5 |
| Softness (S): $1/\eta$                                                                                   | Eq.S6 |
| Fukui functions for electrophilic attack $f^-(\mathbf{r}) = \rho_N(\mathbf{r}) - \rho_{N-1}(\mathbf{r})$ | Eq.S7 |
| Local softness for electrophilic attack: $s^-(\mathbf{r}) = Sf^-(\mathbf{r})$                            | Eq.S8 |

## Tables

Table.S 1 The solubility of H<sub>2</sub>BDC and NH<sub>2</sub>-H<sub>2</sub>BDC in water at different pH.

|      | H <sub>2</sub> BDC | NH <sub>2</sub> -H <sub>2</sub> BDC |
|------|--------------------|-------------------------------------|
| pH=2 | 2.1±0.4            | 90.0±1.4                            |
| pH=3 | 3.1±0.2            | 88.0±3.3                            |
| pH=4 | 18.4±0.7           | 360.0±4.7                           |
| pH=5 | 538.3±2.2          | >1000mg/L                           |
| pH=6 | >1000mg/L          | >1000mg/L                           |
| pH=7 | >1000mg/L          | >1000mg/L                           |

Table.S 2 The  $\mu$  ( $-\chi$ ) of phosphate species.

|                   | PO <sub>4</sub> <sup>3-</sup> | HPO <sub>4</sub> <sup>2-</sup> | H <sub>2</sub> PO <sub>4</sub> <sup>-</sup> | H <sub>3</sub> PO <sub>4</sub> |
|-------------------|-------------------------------|--------------------------------|---------------------------------------------|--------------------------------|
| $\mu$ ( $-\chi$ ) | -2.7                          | -3.0                           | -4.1                                        | -5.1                           |

Table.S 3 The  $\mu$  ( $-\chi$ ) and  $\eta$  of ligands of MOFs.

| L-bases           | I-BDC <sup>2-</sup> | Br-BDC <sup>2-</sup> | F-BDC <sup>2-</sup> | COOH-BDC <sup>2-</sup> | SO <sub>3</sub> H-BDC <sup>2-</sup> | NO <sub>2</sub> -BDC <sup>2-</sup> |
|-------------------|---------------------|----------------------|---------------------|------------------------|-------------------------------------|------------------------------------|
| $\mu$ ( $-\chi$ ) | -3.53               | -3.54                | -3.76               | -3.81                  | -3.90                               | -4.34                              |
| $\eta$            | 5.00                | 5.02                 | 4.86                | 4.53                   | 4.67                                | 4.08                               |

## Figures

Fig.S 1 The XRD patterns and FT-IR spectra of UiO-66, NH<sub>2</sub>-UiO-66, MIL-101(Fe) and NH<sub>2</sub>-MIL-101(Fe) in pure water at pH 2 and their ligands (H<sub>2</sub>BDC and NH<sub>2</sub>-H<sub>2</sub>BDC).

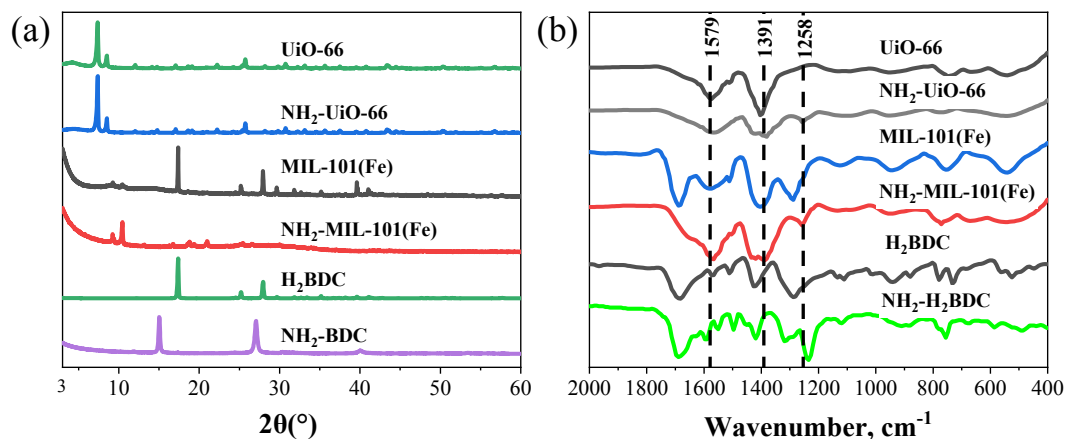

Fig.S 2 XPS analysis of NH<sub>2</sub>-UiO-66 before and after being treated in 3 mM solutions of F<sup>-</sup>, PO<sub>4</sub><sup>3-</sup>, AsO<sub>4</sub><sup>3-</sup> and SO<sub>4</sub><sup>2-</sup> at pH 4, respectively: F 1s (b), P 2p (b), As 2p (c) and S 2p (d).

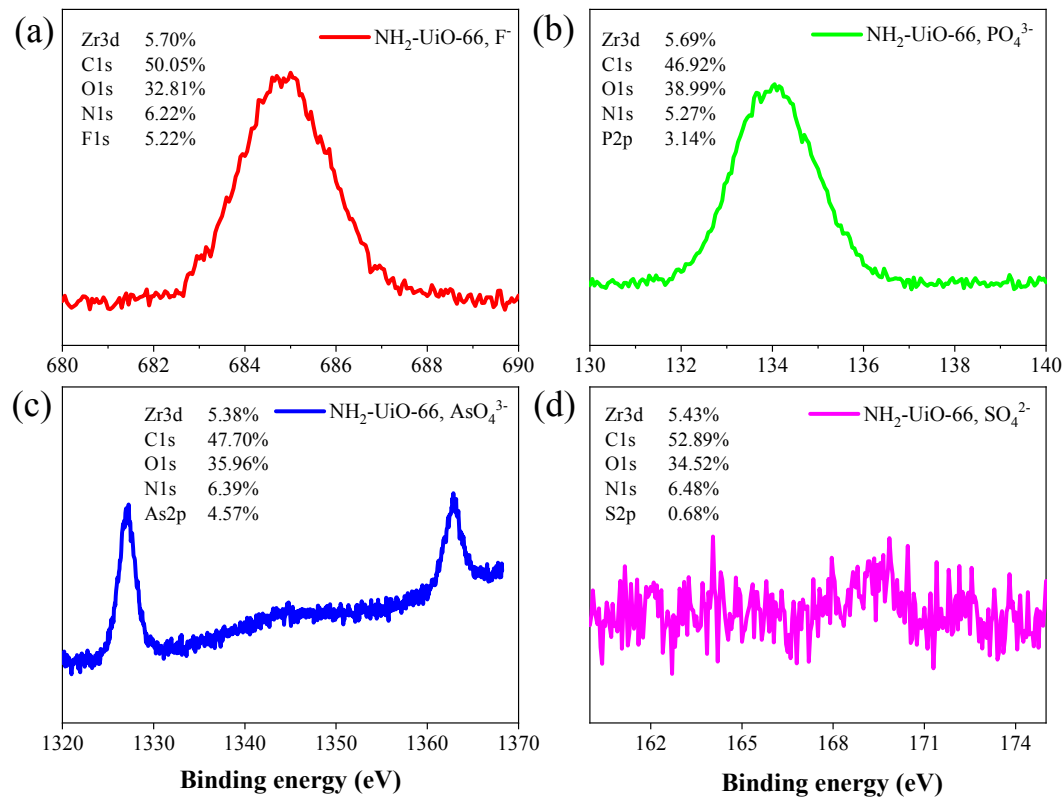

Fig.S 3 FT-IR spectra of UiO-66 and NH<sub>2</sub>-UiO-66 after being treated in 3 mM solution of F<sup>-</sup>, PO<sub>4</sub><sup>3-</sup>, AsO<sub>4</sub><sup>3-</sup> and SO<sub>4</sub><sup>2-</sup> at pH 4, respectively.

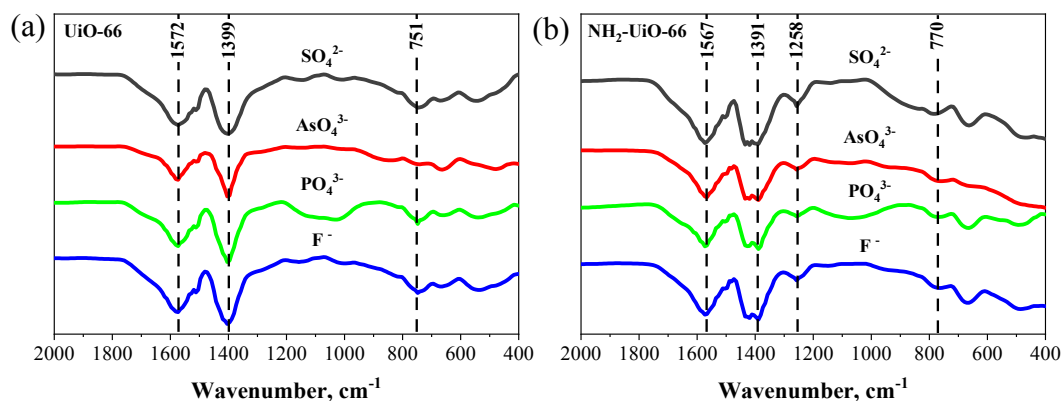

Fig.S 4 Local softness for electrophilic attack (*s*<sup>-</sup>) of L-bases.

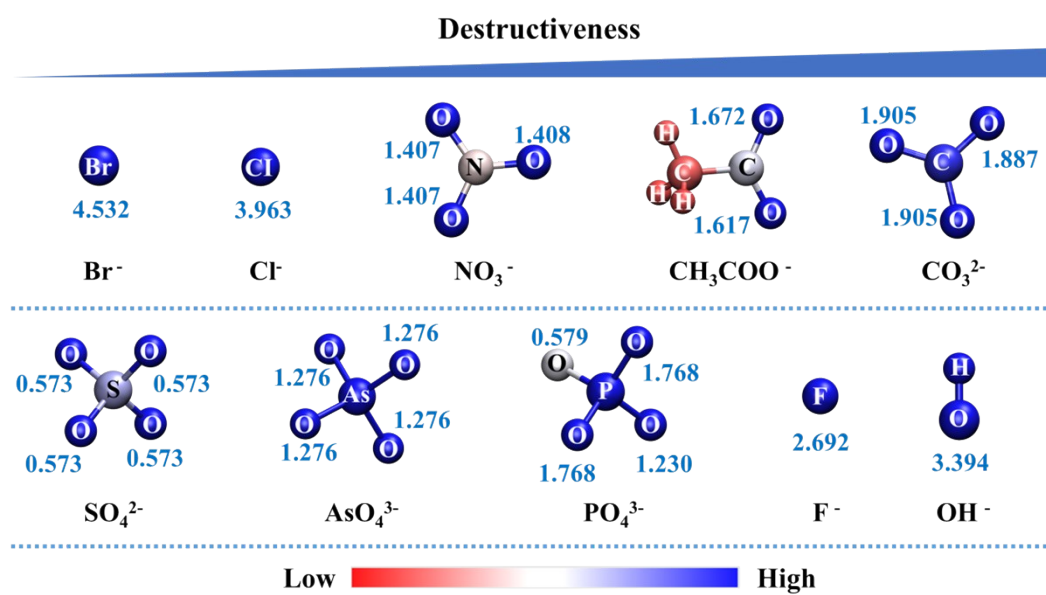

Fig.S 5 Charge of coordinating atoms (CCA) of conjugate acid of different L-bases.

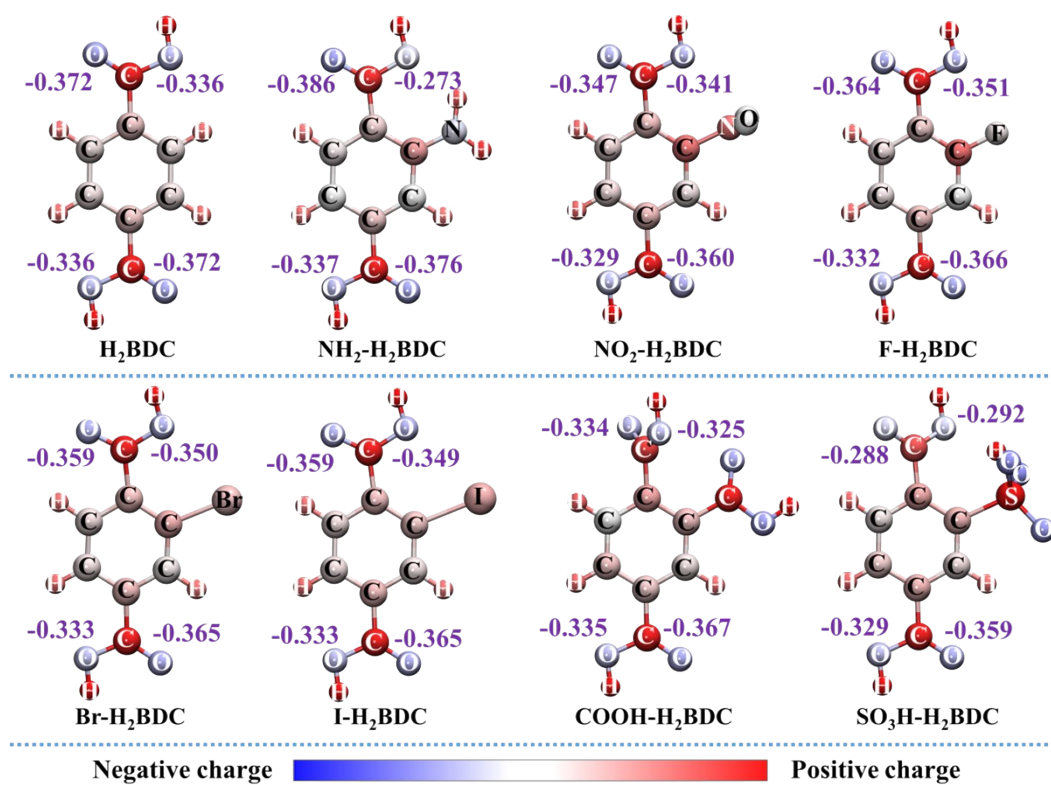

Fig.S 6 Distribution coefficient of phosphate.

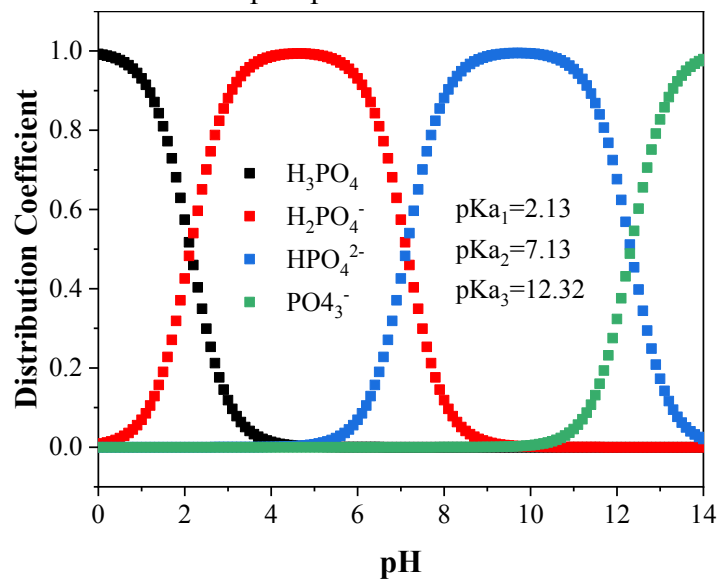

Fig.S 7 The structure and charge distribution of MOFs' ligand.

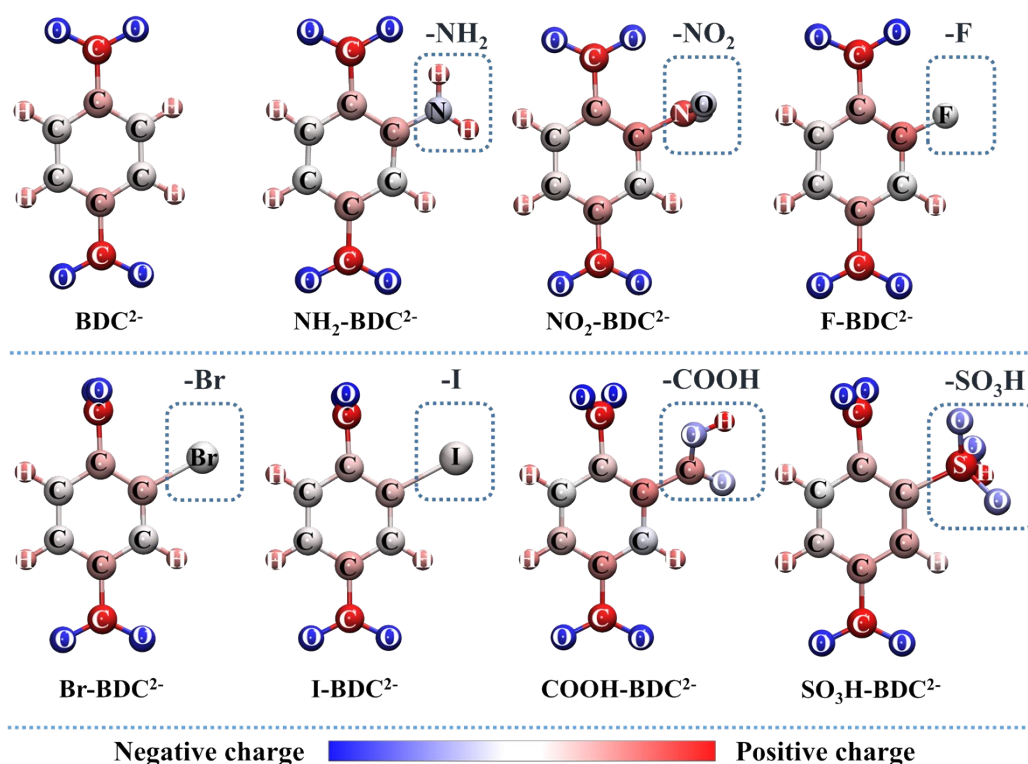

Fig.S 8 The optimized structure of OH-BDC<sup>2-</sup> showed by Van Der Waals radius (a), the CCA of OH-H<sub>2</sub>BDC (b) and the optimized structure of OH-H<sub>2</sub>BDC/PO<sub>4</sub><sup>3-</sup> (c).

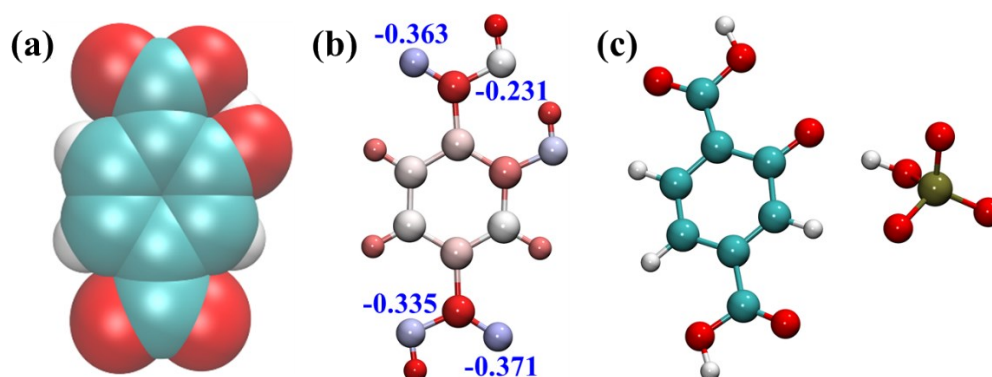

As for OH-UiO-66, the symmetry of its carboxy groups was not affected by the -OH (Fig.S 8a) and the  $\mu(-\chi)$  of OH-BDC<sup>2-</sup> was -3.58, which was slightly higher than that of BDC<sup>2-</sup> (-3.68). However, as shown in Fig.S 8b, one of the coordinating atom of OH-H<sub>2</sub>BDC had obvious smaller negative charge (-0.231) than that of H<sub>2</sub>BDC (Fig.S 5). Therefore, it is hard to judge if OH-UiO-66 is more stable than UiO-66, only according to  $\mu(-\chi)$  and CCA. The pKa of -OH on OH-H<sub>2</sub>BDC is not found in the iBond database<sup>[1]</sup>, but the pKa of -OH on different compounds is relatively high, such as salicylic acid (13.2), phenol (9.99) and p-Hydroxybenzoic acid (9.33), implying H-Bond can form between OH-H<sub>2</sub>BDC and PO<sub>4</sub><sup>3-</sup> in a wide range of pH. Beyond expectation, according to the optimized structure of OH-H<sub>2</sub>BDC with PO<sub>4</sub><sup>3-</sup> (Fig.S 8c), the H on -OH on OH-

---

H<sub>2</sub>BDC was grabbed by PO<sub>4</sub><sup>3-</sup>, instead of forming stable H-Bond between OH-H<sub>2</sub>BDC and PO<sub>4</sub><sup>3-</sup>. Apparently, -OH can not enhance the stability of MOFs by capturing L-bases.

#### Reference

[1] Internet bond-energy databank (pKa and BDE)--iBonD home page.  
<http://ibond.chem.tsinghua.edu.cn>
